# Supplementary material for: Adaptive and pathological connectivity responses in Parkinson’s disease brain networks
Source: Research Square preprint supplement (doi:10.21203/rs.3.rs-927446/v1), 2021-10-12
Supplement: Supplementary file 1 [file fa0859025156eabff36f7e8f.docx]

**Supplementary Tables**

**Table S1A. Increased Assortativity in PD (FDG PET): North Shore**

|  | PD  (n=96) | HC1  (n=22) |
| --- | --- | --- |
| Age (y)1 | 57.8 ± 9.6a | 56.8 ± 9.9 |
| Gender (M/F) | 66/30 | 14/8 |
| Disease duration (y) | 10.9 ± 6.0 | - |
| UPDRS (motor)b | 30.8 ± 14.5 | - |
| PDRP expressionc | 2.52 ± 1.94*** | 0.49 ± 1.04 |

1 Detailed clinical and scan data provided in Tang et al. *Lancet Neurol* 2010.

a Mean ± standard deviation (sd).

b UPDRS (motor): Unified Parkinson’s Disease Rating Scale motor ratings (≥12 hours after medication dose).

c PDRP expression (subject scores: mean ± sd) for the Parkinson’s disease-related pattern (PDRP). Values standardized (*z*-scored) to a reference group composed of 33 healthy control (HC) subjects (Ma et al. *J Cereb Blood Flow Metab* 2007; Spetsieris and Eidelberg *Neuroimage* 2011).

***: p<0.001 for comparison of PD with HC (Student’s *t*-test).

**Table S1B. Increased Assortativity in PD (FDG PET): Validation**

|  | **INDIA** | | **SLOVENIA** | | **COMBINED** | |
| --- | --- | --- | --- | --- | --- | --- |
|  | PD  (n=81) | HC  (n=19) | PD  (n=65) | HC  (n=20) | PD  (n=146) | HC  (n=39) |
| Age (y)1 | 53.5 ± 10.8a | 61.5 ± 5.0 | 68.3 ± 9.3 | 67.2 ± 5.7 | 60.9 ± 10.1 | 64.4 ± 6.03 |
| Gender (M/F) | 59/22 | 8/11 | 37/28 | 8/11 | 96/50 | 16/22 |
| Disease duration (y) | 2.9 ± 1.8 | - | 5.1 ± 3.7 | - | 4.0 ± 2.75 | - |
| UPDRS (motor)b | 23.7 ± 10.5 | - | N/A | - | N/A | - |
| PDRP expressionc | 1.48 ± 1.70*** | 0.00 ± 1.0 | 2.61 ± 2.24*** | 0.00 ± 1.0 | 2.04 ± 1.97*** | 0.00 ± 1.0 |

1 Detailed clinical and scan data provided in Tripathi et al. *J Nucl Med* 2015 and Rus et al. *Eur J Nucl Med Mol Imaging* 2020.

a Mean ± standard deviation (sd).

b UPDRS (motor): Unified Parkinson’s Disease Rating Scale motor ratings (≥12 hours after medication dose).

PDRP expression (subject scores: mean ± sd) for the Parkinson’s disease-related pattern (PDRP) (see **Table S1A**).

***: p<0.01 for comparisons of PD with HC (Student’s *t*-tests).

**Table S1C. Increased Assortativity in PD (rs-fMRI)**

|  | **North Shore1** | | **PPMI2** | |
| --- | --- | --- | --- | --- |
|  | PD (n=20) | HC2 (n=20) | PD (n=102) | HC (n=18) |
| Age (y)a | 59.4 ± 6.8 | 57.5 ± 9.8 | 61.8 ± 10.5 | 64.5 ± 10.7 |
| Gender (M/F) | 14/6 | 13/7 | 71/31 | 14/4 |
| Disease duration (y) | 7.8 ± 6.9 | - | 2.0 ± 1.4 | - |
| UPDRS (motor)b | 24.6 ± 9.3 | - | 21.7 ± 10.9 | - |
| fPDRP expressionc | 1.26± 1.09** | 0.27±1.04 | 1.11± 1.03** | 0.37±1.36 |

1 Detailed clinical and scan data provided in Vo et al. *Hum Brain Mapp* 2017.

2 See Methods. Detailed clinical and scan data can be found at PPMI website (<http://www.ppmi-info.org/>).

a Mean ± standard deviation (sd).

b UPDRS (motor): Unified Parkinson’s Disease Rating Scale motor ratings (≥12 hours after medication dose).

c fPDRP expression (subject scores: mean ± sd) for the rs-fMRI-based Parkinson’s disease-related pattern (fPDRP).

** p<0.01 for comparison of PD with HC (Student’s t-*t*est).

**Table S2A. Increasing Assortativity with Advancing PD (FDG PET): Longitudinal Study**

|  | PD | HC3 |
| --- | --- | --- |
|  | (n=15) | (n=15) |
| Age (y)1 | 58.0 ± 10.2a | 56.7±12.3 |
| Gender (M/F) | 11/4 | 8/7 |
| Disease duration (y) |  | - |
| Baseline | 2.6 ± 1.8 |  |
| 2 years | 4.8 ± 1.8 |  |
| 4 years | 6.5 ± 2.0 |  |
| UPDRS (motor)b |  | - |
| Baseline | 9.0 ± 4.5 |  |
| 2 years | 14.8 ± 4.3† |  |
| 4 years | 17.8 ± 4.6†† |  |
| PDRP expressionc |  |  |
| Baseline | 0.9 ± 1.5*** | 0.06 ± 0.79 |
| 2 years | 1.4 ± 1.0*** | - |
| 4 years | 2.7 ± 1.1***†† | - |

1 Detailed clinical and scan data provided in Huang et al. *Brain* 2007 and Tang et al. *J Neurosci* 2010.

a Mean ± standard deviation (sd).

b UPDRS (motor): Unified Parkinson’s Disease Rating Scale motor ratings (≥12 hours after medication dose) at each time point (TP).

c PDRP expression (subject scores: mean ± sd) for the Parkinson’s disease-related pattern (PDRP) (see **Table S1A**).

*, **, ***: p<0.05, p<0.01, p<0.001 for comparisons of PD at each TP with HC (Student’s *t*-tests corrected for multiple comparisons).

†, ††, †††: p<0.05, p<0.01, p<0.001 for comparison of TP2 and TP3 with TP1; mixed effects model with post-hoc contrasts (Tukey-Kramer HSD).

**Table S2B. Increased Assortativity with Advancing PD (FDG PET): Cross-sectional Study**

|  | PD-Early | PD-Mid | PD-Late | HC4 |
| --- | --- | --- | --- | --- |
|  | (n=20) | (n=20) | (n=20) | (n=20) |
| Age (y)1 | 61.5 ± 10.6a | 58.9 ± 8.3 | 62.5 ± 7.4 | 60.9 ± 8.5 |
| Gender (M/F) | 16/4 | 16/4 | 11/9 | 14/6 |
| Disease duration (y) | 2.6 ± 1.1 | 5.8 ± 1.4 | 14.5 ± 3.9 | - |
| UPDRS (motor)b | 14.7 ± 7.0 | 24.4 ± 12.6†† | 36.1 ± 9.0†† | - |
| PDRP expressionc | 1.19 ± 1.53* | 2.48 ± 2.00*** | 2.67 ± 1.53***† | -0.11 ± 1.12 |

1 PD-Early: Early-stage PD patients (duration 0-4 years). This group included baseline scans from the early PD longitudinal cohort (**Table S2A**).

PD-Mid: Midstage PD patients (duration 5-9 years).

PD-Late: Late-stage PD patients (duration ≥10 years).

a Mean ± standard deviation (sd).

b UPDRS (motor): Unified Parkinson’s Disease Rating Scale motor ratings (≥12 hours after medication dose).

c PDRP expression (subject scores: mean ± sd) for the Parkinson’s disease-related pattern (PDRP) (see **Table S1A**).

*, **, ***: p<0.05, p<0.01, p<0.001 for comparisons of each PD group with HC subjects (Student’s *t*-tests corrected for multiple comparisons).

†, ††, †††: p<0.05, p<0.01, p<0.001 for comparisons among the PD groups; one-way ANOVA with post-hoc contrasts (Tukey-Kramer HSD).

**Table S2C. Genotypic Effects on Assortativity (FDG PET): GBA vs. LRRK2 Mutations**

|  | PD-LRRK2 | PD-GBA | HC5 |
| --- | --- | --- | --- |
|  | (n=14) | (n=12) | (n=14) |
| Age (y)1 | 58.2 ± 14.4a | 56.5 ± 5.9 | 58.9 ±8.7 |
| Gender (M/F) | 7/7 | 8/4 | 8/6 |
| Disease duration (y) | 7.4 ± 6.6 | 8.3 ± 5.2 | - |
| UPDRS (motor)b | 18.3 ± 8.1 | 20.3 ± 7.2 | - |
| PDRP expressionc | 1.25 ± 1.15*††† | 3.27 ± 1.32*** | -0.03 ± 0.79 |
| PDCP expressiond | 0.63 ± 1.062*† | 1.53 ± 0.69*** | -0.17 ± 0.76 |

1 Detailed clinical and scan data provided in Schindlbeck et al. *Cereb Cortex* 2020.

a Mean ± standard deviation (sd).

b UPDRS (motor): Unified Parkinson’s Disease Rating Scale motor ratings ate (≥12 hours after medication dose).

c PDRP expression (subject scores: mean ± sd) for the Parkinson’s disease-related pattern (PDRP) (see **Table S1A**).

d PDCP expression (subject scores: mean ± sd) for the Parkinson’s disease cognition-related pattern (PDCP) standardized to values from 15 healthy volunteer subjects (Mattis et al. *Neurology* 2016).

*, **, ***: p<0.05, p<0.01, p<0.001 for comparisons of each PD group with HC subjects.

†, ††, †††: p<0.05, p<0.01, p<0.001 for comparisons between the PD groups; one-way ANOVA with post-hoc contrasts (Tukey-Kramer HSD).

**Table S2D. Effects of Treatment on Assortativity (FDG PET): Levodopa Infusion**

|  | PD | HC6 |
| --- | --- | --- |
|  | (n=14) | (n=14) |
| Age (y)1 | 60.0 ± 9.9a | 60.7 ± 8.2 |
| Gender (M/F) | 10/4 | 10/4 |
| Duration (years) | 6.1 ± 4.9 | - |
| UPDRS (motor) |  |  |
| OFFb | 22.3 ± 7.9 | - |
| ONc | 12.9 ± 6.7††† | - |
| PDRP expression |  |  |
| OFFb | 1.74 ± 2.14* | -0.09 ± 0.81 |
| ONc | 1.45 ± 2.21*† | - |

1 Detailed clinical and scan data provided in Jourdain et al. *JCI Insight* 2016.

a Mean ± standard deviation (sd).

b OFF: Values recorded in the off-state (at least 12 hours after last medication dose).

c ON: Values recorded in the on-state (during an individually titrated intravenous levodopa infusion).

*: p<0.05 for comparisons of each condition with HC subjects (Student’s *t*-tests).

†, †††: p<0.05, p<0.001 for between-condition comparisons (paired Student’s *t*-tests).

**Table S2E. Effects of Treatment on Assortativity (FDG PET): Gene Therapy vs. Sham Surgery**

|  | PD  Gene therapy | PD  Sham surgery | HC7 |
| --- | --- | --- | --- |
|  | (n=16) | (n=21) | (n=22) |
| Age (y)1 | 62.2 ± 6.9a | 61.3 ± 7.5 | 60.6 ± 9.9 |
| Gender (M/F) | 12/4 | 15/6 | 17/5 |
| Duration (years) | 10.6 ± 4.3 | 12.0 ± 5.0 | - |
| UPDRS (motor) |  |  |  |
| Baselineb | 34.8 ± 6.6 | 39.0 ± 8.8 | - |
| 12 monthsc | 26.6 ± 8.2†† | 33.5 ± 11.1†† | - |
| PDRP expression |  |  |  |
| Baseline | 2.36 ± 1.68*** | 2.67 ± 1.86*** | 0.79 ± 0.76 |
| 12 months | 2.59 ± 2.05***†† | 3.02 ± 2.05***†† | - |

1 Detailed clinical and scan data provided in Niethammer et al. *JCI Insight* 2017 and Niethammer et al. *Sci Transl Med* 2018.

a Mean ± standard deviation (sd).

b Values in the off-state measured before randomization to gene therapy or sham surgery.

c Values in the off-state measured 12 months after gene therapy or sham surgery.

*, **, ***: p<0.05, p<0.01, p<0.001 for comparisons of each time point with HC subjects (Student’s *t*-tests).

†, ††, †††: p<0.05, p<0.01, p<0.001 for comparisons between baseline and 12-months (paired Student’s *t*-tests).

**Table S3A. PDRP nodes (n=38)**

| Nodea | Abbreviationb | Module | PDRP weight |
| --- | --- | --- | --- |
| Amygdala-L | Amy L (41) | core | 1.67 |
| Amygdala-R | Amy R (42) | core | 1.84 |
| Angular-L | Ang L (65) | periphery | -2.71 |
| Angular-R | Ang R (66) | periphery | -2.40 |
| Cerebellum-L | Ceb L (91) | core | 1.26 |
| Cerebellum-R | Ceb R (92) | core | 1.22 |
| Cuneus-L | Cun L (45) | periphery | -1.05 |
| Cuneus-R | Cun R (46) | periphery | -1.24 |
| Frontal-Mid-L | MFr L (7) | periphery | -1.11 |
| Frontal-Mid-R | MFr R (8) | periphery | -0.95 |
| Frontal-Sup-Medial-R | SFrM R (24) | periphery | -1.12 |
| Hippocampus-L | Hip L (37) | core | 1.64 |
| Hippocampus-R | Hip R (38) | core | 1.75 |
| Insula-R | Ins R (30) | core | 0.95 |
| Occipital-Inf-L | IOcc L (53) | periphery | -1.43 |
| Occipital-Inf-R | IOcc R (54) | periphery | -1.29 |
| Occipital-Mid-L | MOcc L (51) | periphery | -1.54 |
| Occipital-Mid-R | MOcc R (52) | periphery | -1.55 |
| Occipital-Sup-R | SOcc R (50) | periphery | -1.24 |
| Pallidum-L | Pal L (75) | core | 1.16 |
| Pallidum-R | Pal R (76) | core | 1.19 |
| Paracentral-Lobule-Lc | ParaC L (69) | core | 1.28 |
| Paracentral-Lobule-Rc | ParaC R (70) | core | 1.23 |
| ParaHippocampal-L | PHip L (39) | core | 1.22 |
| ParaHippocampal-R | PHip R (40) | core | 1.26 |
| Parietal-Inf-L | IPar L (61) | periphery | -1.73 |
| Parietal-Inf-R | IPar R (62) | periphery | -1.87 |
| Parietal-Sup-L | SPar L (59) | periphery | -1.25 |
| Parietal-Sup-R | SPar R (60) | periphery | -1.16 |
| Pons-L | Pon L (94) | core | 0.99 |
| Pons-R | Pon R (95) | core | 1.20 |
| Precuneus-L | PCun L (67) | periphery | -1.04 |
| Precuneus-R | PCun R (68) | periphery | -1.17 |
| Putamen-L | Put L (73) | core | 1.40 |
| Putamen-R | Put R (74) | core | 1.56 |
| Thalamus-L | Thal L (77) | core | 1.22 |
| Thalamus-R | Thal R (78) | core | 0.85 |
| Vermis | Ver (93) | core | 2.14 |

a Nodes according to the Anatomical Automatic Labeling (AAL) atlas (Tzourio-Mazoyer et al. *Neuroimage* 2002). The number given for each significant region denotes the standardized region-of-interest (ROI) from the atlas that was used in the graph theory analysis (see text).

b Abbreviations and corresponding AAL numbers.

c Paracentral-Lobule L/R: PDRP cluster maximum (+/-8 -18 68) maps to SMA.

**Table S3B. fPDRP nodes (n=39)**

| Nodea | Abbreviationb | fPDRP weight |
| --- | --- | --- |
| *Amygdala_L* | Amy L (41) | 1.06 |
| *Amygdala_R* | Amy R (42) | 1.84 |
| *Cerebelum_L* | Ceb L (91) | 4.07 |
| *Cerebelum_R* | Ceb R (92) | 4.42 |
| Cingulum_Mid_L | MCin L (33) | 1.12 |
| Cingulum_Mid_R | MCin R (34) | 0.85 |
| Frontal_Med_Orb_R | MFrOr R (26) | 0.43 |
| Fusiform_L | Fus L (55) | 1.90 |
| Fusiform_R | Fus R (56) | 2.00 |
| Heschl_L | Hes L (79) | 0.01 |
| *Hippocampus_L* | Hip L (37) | 1.09 |
| *Hippocampus_R* | Hip R (38) | 1.61 |
| Lingual_L | Lin L (47) | 1.47 |
| Lingual_R | Lin R (48) | 1.96 |
| Olfactory_L | Olf L (21) | 0.24 |
| Olfactory_R | Olf R (22) | 0.88 |
| *Pallidum_L* | Pal L (75) | 0.66 |
| *Pallidum_R* | Pal R (76) | 0.90 |
| *Paracentral_Lobule_L* | ParaC L (69) | 2.50 |
| *Paracentral_Lobule_R* | ParaC R (70) | 2.97 |
| *ParaHippocampal_L* | PHip L (39) | 1.59 |
| *ParaHippocampal_R* | PHip R (40) | 2.42 |
| *Parietal_Sup_L* | SPar L (59) | 0.02 |
| *Pons_L* | Pon L (94) | 4.61 |
| *Pons_R* | Pon R (95) | 4.99 |
| Postcentral_L | PostC L (57) | 0.02 |
| Postcentral_R | PostC R (58) | 0.35 |
| Precentral_L | PreC L (1) | 0.01 |
| Precentral_R | PreC R (2) | 0.24 |
| *Precuneus_L* | PCun L (67) | 0.34 |
| *Precuneus_R* | PCun R (68) | 0.31 |
| *Putamen_L* | Put L (73) | 0.38 |
| *Putamen_R* | Put R (74) | 0.50 |
| Rectus_R | Rec R (28) | 0.01 |
| Supp_Motor_Area_L | SMA L (19) | 1.68 |
| Supp_Motor_Area_R | SMA R (20) | 2.94 |
| *Thalamus_L* | Thal L (77) | 1.09 |
| *Thalamus_R* | Thal R (78) | 1.20 |
| *Vermis* | Ver (93) | 5.78 |

a Nodes according to the Anatomical Automatic Labeling (AAL) atlas (Tzourio-Mazoyer et al. *Neuroimage* 2002). The number given for each significant region denotes the standardized region-of-interest (ROI) from the atlas that was used in the graph theory analysis (see text).

b Abbreviations and corresponding AAL numbers.

[Nodes that are common to both PDRP and fPDRP are in *italic* font; nodes that are unique to fPDRP are in regular font.]

**Table S3C. PDCP nodes (n=35)**

| Nodea | Abbreviationb | Module | PDCP weight |
| --- | --- | --- | --- |
| *Amygdala-L* | Amy L (41) | periphery | 1.27 |
| *Amygdala-R* | Amy R (42) | periphery | 1.89 |
| *Angular-L* | Ang L (65) | core | -1.71 |
| *Cerebellum-L* | Ceb L (91) | periphery | 1.29 |
| *Cerebellum-R* | Ceb R (92) | periphery | 1.90 |
| Frontal-Inf-Oper-L | IFrOp L (11) | core | -1.41 |
| Frontal-Inf-Tri-L | IFrTr L (13) | core | -1.32 |
| *Frontal-Mid-L* | MFr L (7) | core | -1.68 |
| Frontal-Sup-L | SFr L (3) | core | -1.48 |
| Frontal-Sup-Medial-L | SFrM L (23) | core | -1.75 |
| *Frontal-Sup-Medial-R* | SFrM R (24) | core | -1.39 |
| Frontal-Sup-R | SFr R (4) | core | -1.01 |
| Fusiform-R | Fus R (56) | periphery | 1.26 |
| *Hippocampus-L* | Hip L (37) | periphery | 1.32 |
| *Hippocampus-R* | Hip R (38) | periphery | 1.86 |
| *Occipital-Inf-R* | IOcc R (54) | periphery | 1.02 |
| Olfactory-R | Olf R (22) | periphery | 0.99 |
| *Pallidum-R* | Pal R (76) | periphery | 1.69 |
| *ParaHippocampal-R* | PHip R (40) | periphery | 1.50 |
| *Parietal-Inf-L* | IPar L (61) | core | -1.63 |
| *Parietal-Sup-L* | SPar L (59) | core | -1.76 |
| *Pons-L* | Pon L (94) | periphery | 1.48 |
| *Pons-R* | Pon R (95) | periphery | 1.66 |
| Precentral-Lc | PreC L (1) | core | -1.43 |
| Precuneus-L | PCun L (67) | core | -1.43 |
| Precuneus-R | PCun R (68) | core | -0.98 |
| Putamen-R | Put R (74) | periphery | 1.14 |
| Supp-Motor-Area-Ld | SMA L (19) | core | -2.17 |
| Supp-Motor-Area-Rd | SMA R (20) | core | -1.80 |
| SupraMarginal-L | SMarg L (63) | core | -1.02 |
| Temporal-Inf-R | ITemp R (90) | periphery | 1.39 |
| Temporal-Mid-R | MTemp R (86) | periphery | 0.97 |
| *Thalamus-L* | Thal L (77) | periphery | 0.98 |
| *Thalamus-R* | Thal R (78) | periphery | 1.41 |
| *Vermis* | Ver (93) | periphery | 1.82 |

a Nodes according to the Anatomical Automatic Labeling (AAL) atlas (Tzourio-Mazoyer et al. *Neuroimage* 2002). The number given for each significant region denotes the standardized region-of-interest (ROI) from the atlas that was used in the graph theory analysis (see text).

b Abbreviations and corresponding AAL numbers.

c Precentral-L: PDCP cluster maximum at (-23 -7 72) maps to rostral PMC.

d Supp-Motor-Area-L/R (SMA): PDCP cluster maximum at (+/-4 14 57) maps to pre-SMA.

[Nodes that are common to both PDRP and PDCP are in *italic* font; nodes that are unique to PDCP are in regular font.]

**Table S3D. GADRP nodes (n=14)**

| Nodea | Abbreviationb | GADRP weight |
| --- | --- | --- |
| Caudate-L | Caud L (71) | -0.86 |
| Caudate-R | Caud R (72) | -0.39 |
| Frontal-Inf-Orb-L / Insula-L | IFrOr L (15) / Ins L (29) | -1.02 |
| Frontal-Inf-Orb-R | IFrOr R (16) | 0.17 |
| Frontal-Sup-L | SFr L (3) | 1.04 |
| Frontal-Sup-R | SFr R (4) | 0.73 |
| Pallidum-L | Pal L (75) | -1.52 |
| Pallidum-R | Pal R (76) | -1.40 |
| Putamen-L | Put L (73) | -0.99 |
| Putamen-R | Put R (74) | -0.83 |
| Supramarginal-L | SMarg L (63) | 2.76 |
| Supramarginal-R | SMarg R (64) | 1.46 |
| Thalamus-L | Thal L (77) | -2.54 |
| Thalamus-R | Thal R (78) | -1.66 |

a Nodes according to the Anatomical Automatic Labeling (AAL) atlas (Tzourio-Mazoyer et al. *Neuroimage* 2002). The number given for each significant region denotes the standardized region-of-interest (ROI) from the atlas that was used in the graph theory analysis (see text).

b Abbreviations and corresponding AAL numbers.

**Table S4. Gained connections in PDRP space for STN AAV2-GAD gene therapy relative to baseline**

| Subnetwork | Node 1a (AAL) | Node 2a (AAL) | HC | BL | 12m | dr |
| --- | --- | --- | --- | --- | --- | --- |
| core- core | Insula_R (30) | Putamen_R (74) | 0.36 | 0.42 | 0.75 | 0.33 |
|  | Hippocampus_L (37) | Putamen_L (73) | 0.16 | 0.09 | 0.61 | 0.51 |
|  | ParaHippocampal_L (39) | Amygdala_L (41) | 0.55 | 0.37 | 0.71 | 0.35 |
|  | Amygdala_L (41) | Putamen_L (73) | 0.27 | 0.33 | 0.66 | 0.33 |
|  | Putamen_L (73) | Thalamus_L (77) | 0.37 | 0.17 | 0.70 | 0.53 |
|  | Pallidum_L (75) | Thalamus_L (77) | 0.75 | 0.19 | 0.63 | 0.44 |
|  | Vermis (93) | Pons_L (94) | 0.56 | 0.32 | 0.67 | 0.35 |
| periphery-periphery | Frontal_Mid_R (8) | Parietal_Inf_R (62) | -0.04 | 0.33 | 0.73 | 0.40 |

a Nodes according to the Anatomical Automatic Labeling (AAL) atlas (Tzourio-Mazoyer et al. *Neuroimage* 2002). The number given for each significant region denotes the standardized region-of-interest (ROI) from the atlas that was used in the graph theory analysis (see text).

[Abbreviations: healthy control subjects (HC), baseline (BL), 12 months (12m), and absolute difference in the two connectivity measures (dr)].

**Supplementary Figure**

**
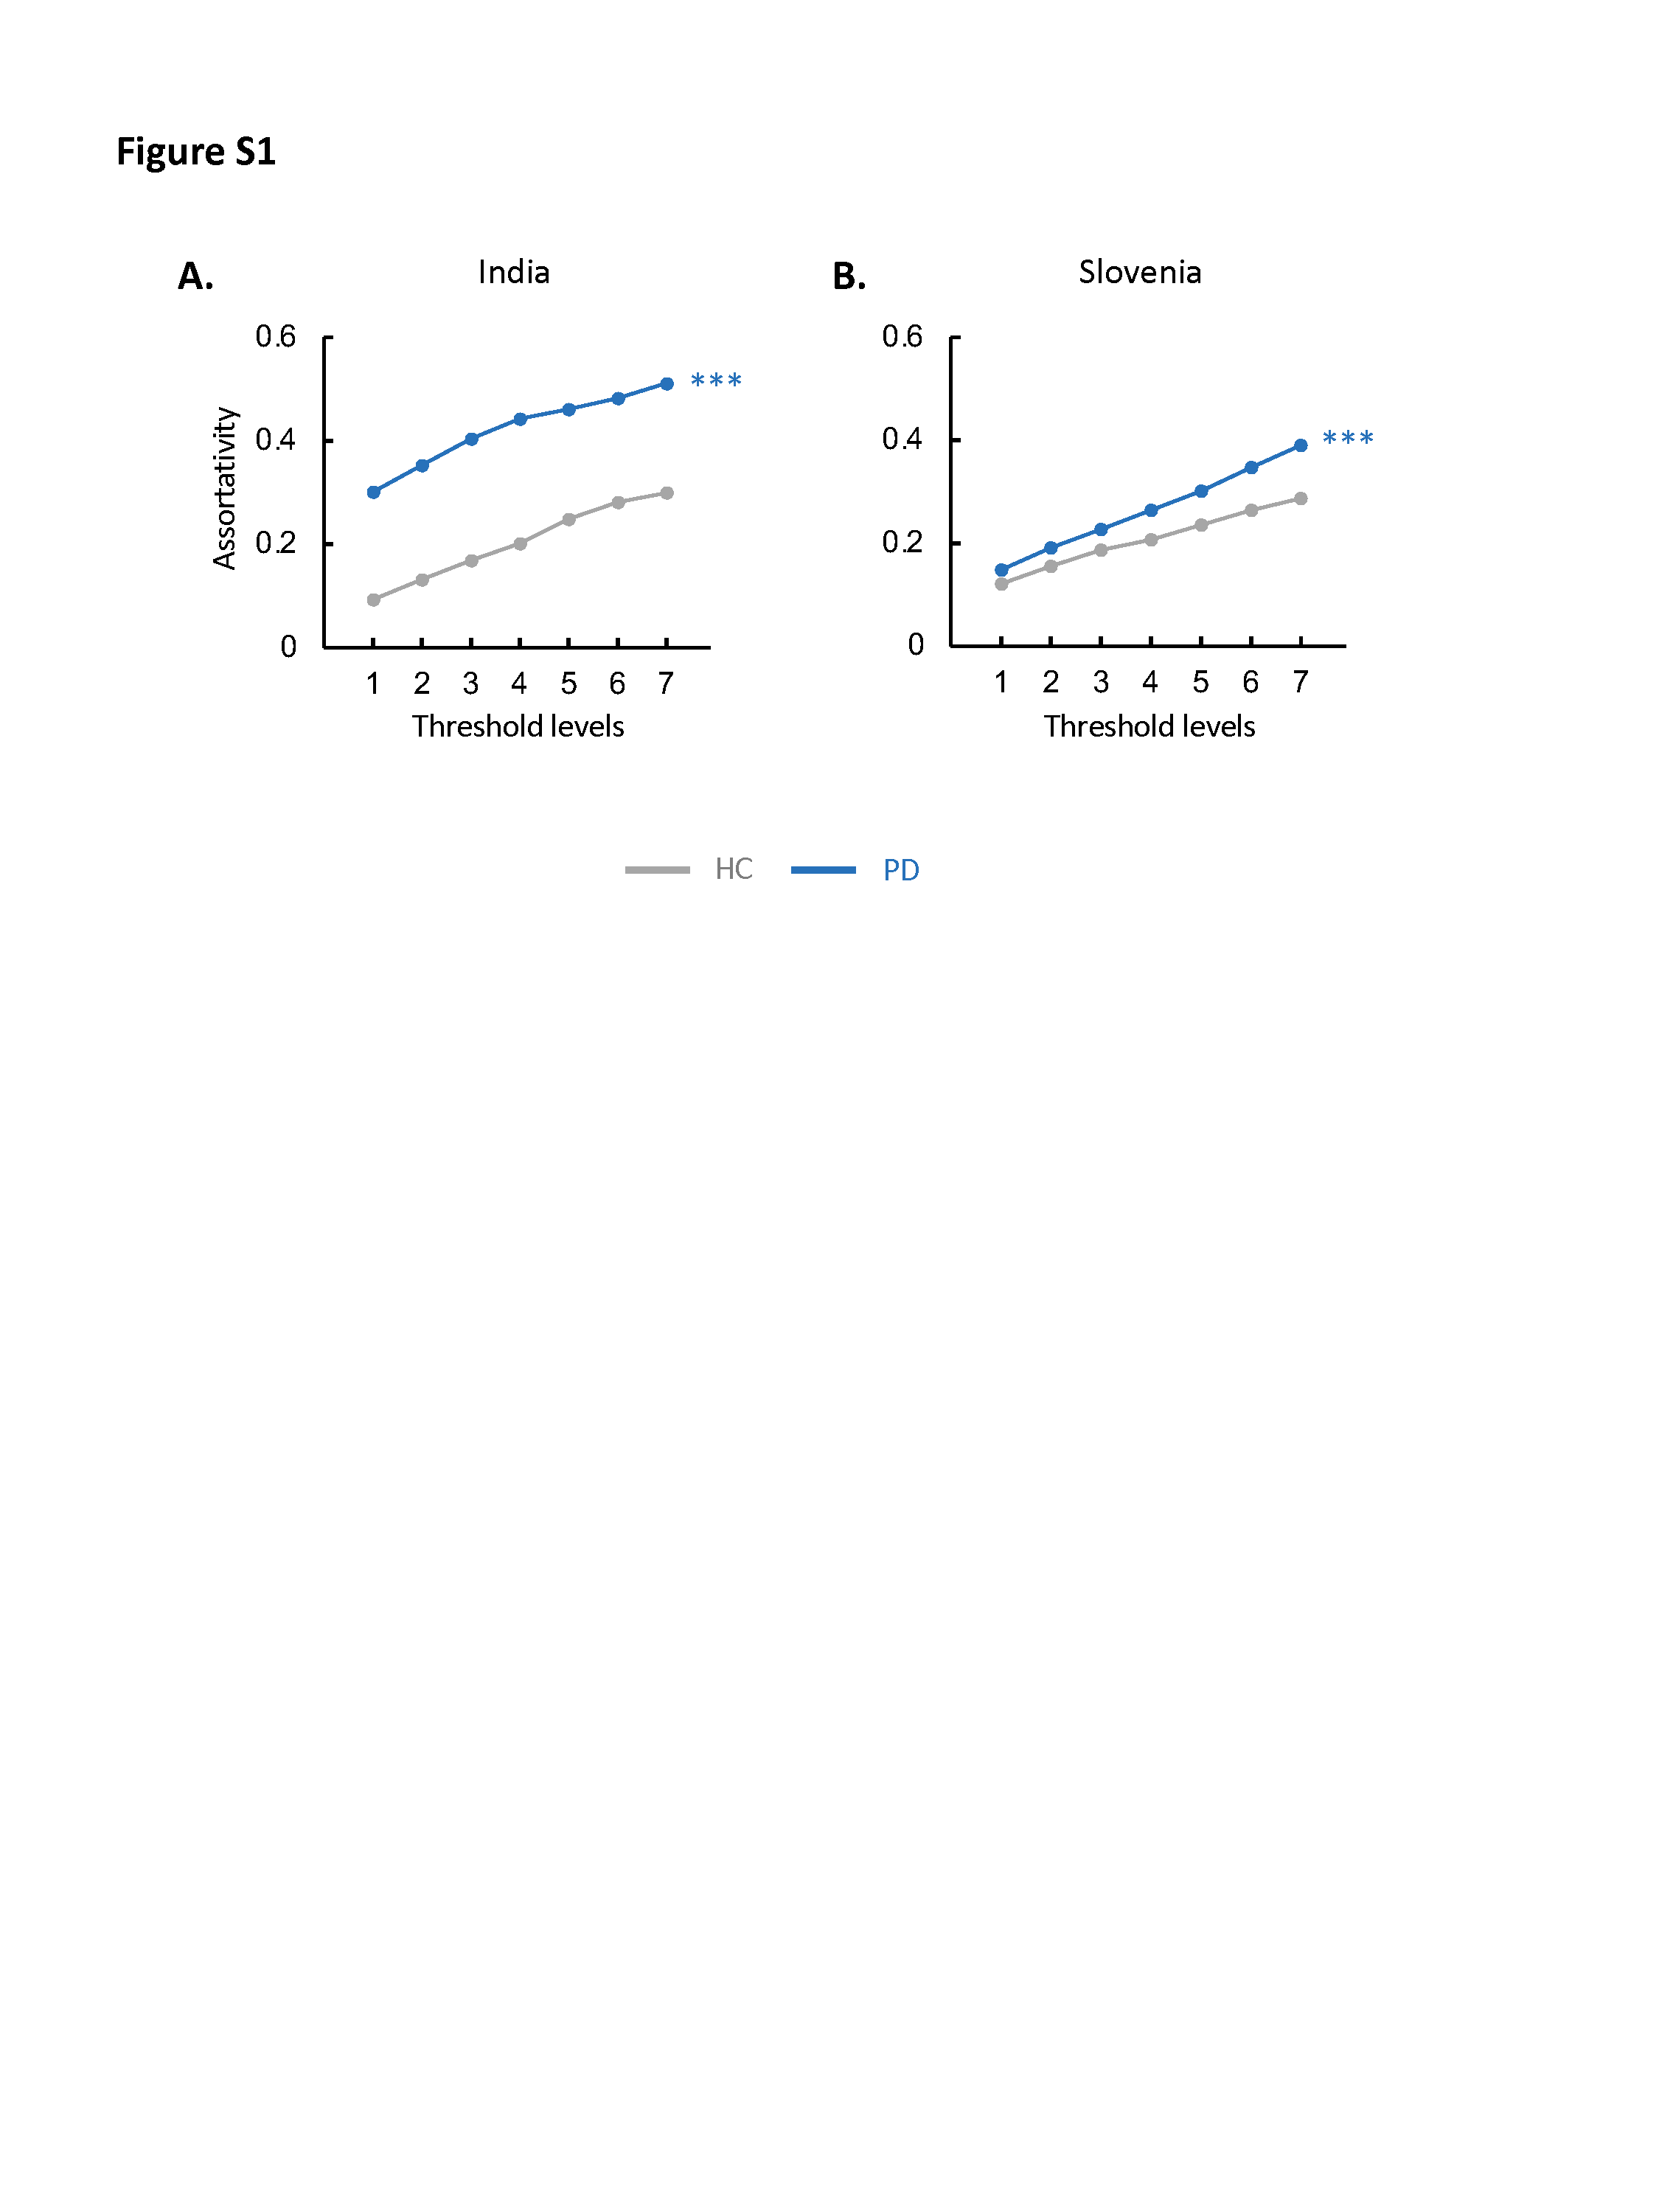
**

**Figure S1. PDRP assortativity in two validation FDG PET datasets.**

In the PDRP space, assortativity was elevated in PD patients compared to healthy control (HC) subjects scanned with FDG PET in **(A)** India (PD: n=81; HC: n=19) and **(B)** Slovenia (PD: n=65; HC: n=20). [Levels 1 to 7 correspond to cutoff graph thresholds of r=0.3 to 0.6 in increments of 0.05. ***p<0.001 compared to HC.]
